# Supplementary material for: How do junior doctors in the UK learn to provide end of life care: a qualitative evaluation of postgraduate education
Source: Springer Nature journal article supplement (doi:10.1186/s12904-015-0039-6), 2015-09-23
Supplement: MOESM1 [file 9754522]

Additional file 1: Outline of interview schedule and examples of questions and probes

| Focus area                       | Examples of questions and probes                                                                                                                                                                                                                                                                                                                                                                                                                                                                                                                                                                           |
|----------------------------------|------------------------------------------------------------------------------------------------------------------------------------------------------------------------------------------------------------------------------------------------------------------------------------------------------------------------------------------------------------------------------------------------------------------------------------------------------------------------------------------------------------------------------------------------------------------------------------------------------------|
| Demographics                     | <p>What year of training are you in?<br/>           Where are you currently working?<br/>           Where else have you worked?<br/>           Which Medical school did you attend?<br/>           What field of medicine do you hope to work in?</p>                                                                                                                                                                                                                                                                                                                                                      |
| Confidence in patient management | <p>How confident do you feel in managing a patient who might be approaching the end of their life?<br/>           Has your training so far has enabled you to cope with your encounters with dying patients?</p>                                                                                                                                                                                                                                                                                                                                                                                           |
| Experiences in training          | <p>How do you think that you learned to care for patients who are dying?<br/>           What experiences have you found most helpful in learning how to manage patients who are thought to be dying?<br/>           Why was this useful?<br/>           In the last few years, what teaching have you had on end of life care?<br/>           What type of teaching was that?<br/>           Have you had training other than formal teaching sessions?<br/>           Who has provided the most education in this area?<br/>           What do you think were the most useful learning opportunities?</p> |
| Suggestions for improvements     | <p>What could have been improved about your training?<br/>           Would you like more teaching in Palliative or end of life care?<br/>           What would be most helpful for you?</p>                                                                                                                                                                                                                                                                                                                                                                                                                |
| Close                            | <p>Is there anything else you would like to add that has not already been discussed?<br/>           Do you have any comments or concerns about what we have discussed?</p>                                                                                                                                                                                                                                                                                                                                                                                                                                 |
